# Supplementary material
Source: PubMed Central journal article supplement (PMC3150190)
Supplement: NIHMS310110-supplement-SuppFig1.pdf [file NIHMS310110-supplement-SuppFig1.pdf]

Fig. S1.

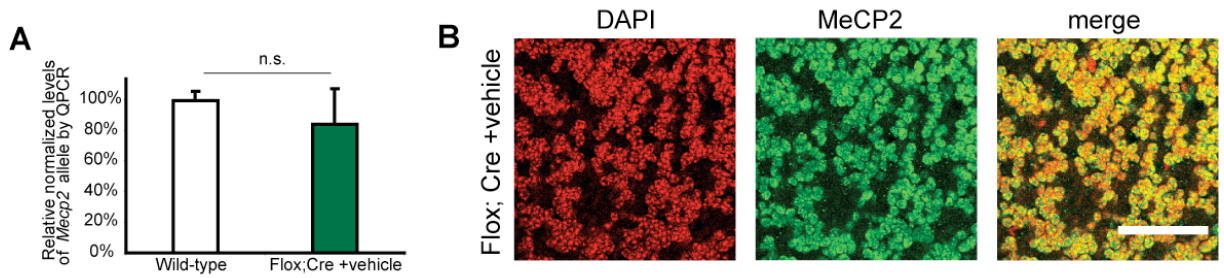

**Fig. S1. Minimal recombination in vehicle-treated Flox;CreER mice.**

(A) Relative levels of unrecombined *Mecp2*<sup>flox/y</sup>; CreER<sup>+/-</sup> mice (Flox;Cre +vehicle) are 84 ± 24% of wild-type animals (n= 4-5 mice per genotype) at 23 weeks of life by QPCR. Results are presented as mean ± s.e.m, normalized to autosomal gene, *Pcdhb2*. (B) MeCP2 immunoreactivity in the cerebellum remains strong in a vehicle-treated mouse harvested at 28 weeks of life. Scale bar = 50um.
