# Supplementary material
Source: PubMed Central journal article supplement (PMC3150190)
Supplement: NIHMS310110-supplement-SuppReferences.pdf [file NIHMS310110-supplement-SuppReferences.pdf]

### References for Supporting Online Material

8. R. C. Samaco et al., *Hum. Mol. Genet.* **17**, 1718-1727 (2008).
9. H.-T. Chao et al., *Nature* **468**, 263-269 (2010).
